# Supplementary material for: An In Silico and an In Vitro Inhibition Analysis of Glycogen Phosphorylase by Flavonoids, Styrylchromones, and Pyrazoles
Source: MDPI journal article supplement (doi:10.3390/nu14020306), 2022-01-12
Supplement: s1 [file s1]

## Supporting Information

**Supporting Table S1.** PDB structures used in this study.

| PDB code | Resolution (Å) | Species                      |
|----------|----------------|------------------------------|
| 1L5Q     | 2.25           | <i>Homo sapiens</i>          |
| 1L5R     | 2.1            |                              |
| 1L5S     | 2.1            |                              |
| 1L7X     | 2.3            |                              |
| 3DD1     | 2.57           |                              |
| 3DDS     | 1.8            |                              |
| 3DDW     | 1.9            |                              |
| 1Z8D     | 2.3            |                              |
| 1C8K     | 1.76           | <i>Oryctolagus cuniculus</i> |
| 1C8L     | 2.3            |                              |
| 1E1Y     | 2.23           |                              |
| 1GFZ     | 2.3            |                              |
| 1UZU     | 2.3            |                              |
| 1Z62     | 1.9            |                              |
| 2G9R     | 2.07           |                              |
| 2G9U     | 2.15           |                              |
| 3BCR     | 2.14           |                              |
| 3BD7     | 1.9            |                              |
| 3BDA     | 2              |                              |
| 3EBP     | 2              |                              |
| 4YUA     | 2              |                              |
| 4Z5X     | 2.1            |                              |
| 6Y55     | 2.38           |                              |
| 6Y5C     | 2.4            |                              |
| 6Y5O     | 2.33           |                              |
| 8GPB     | 2.2            |                              |
| 3EBO     | 1.9            |                              |

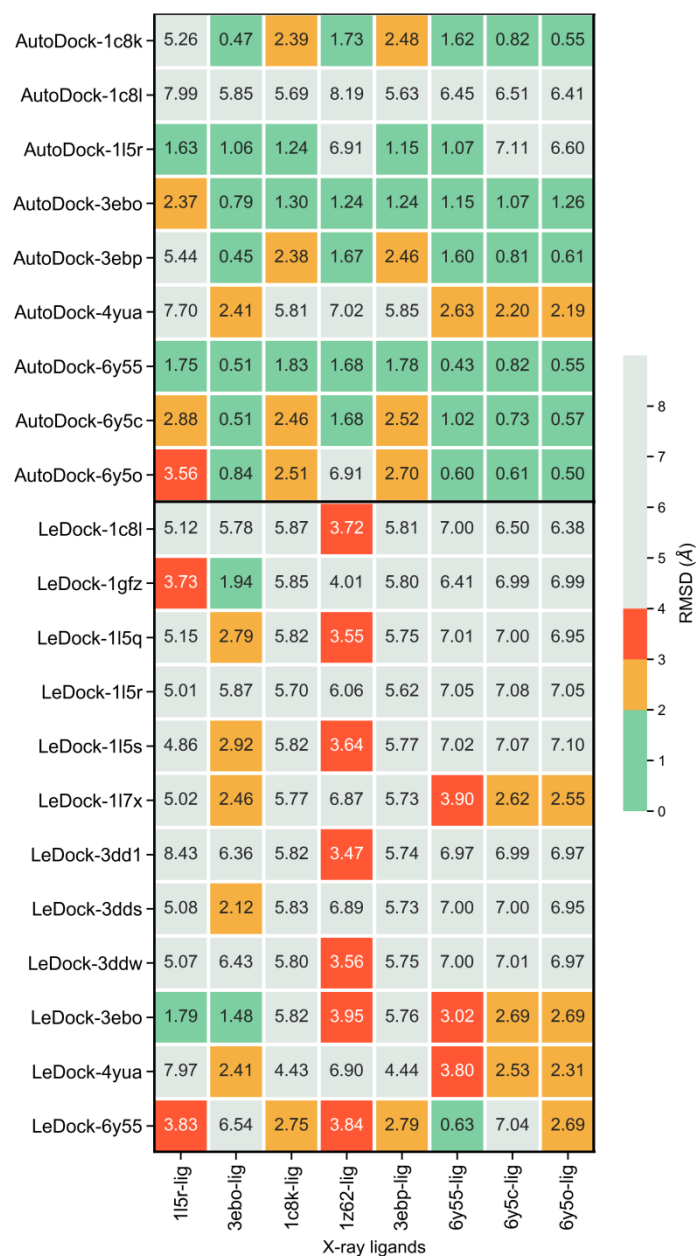

**Supporting Figure S1.** Cross docking performance for the two best scoring methods selected from self-docking - LeDock and AutoDock. This matrix resulted from docking each X-ray ligand onto every available protein PDB structure and through comparison of the top-scoring pose with the corresponding X-ray pose.

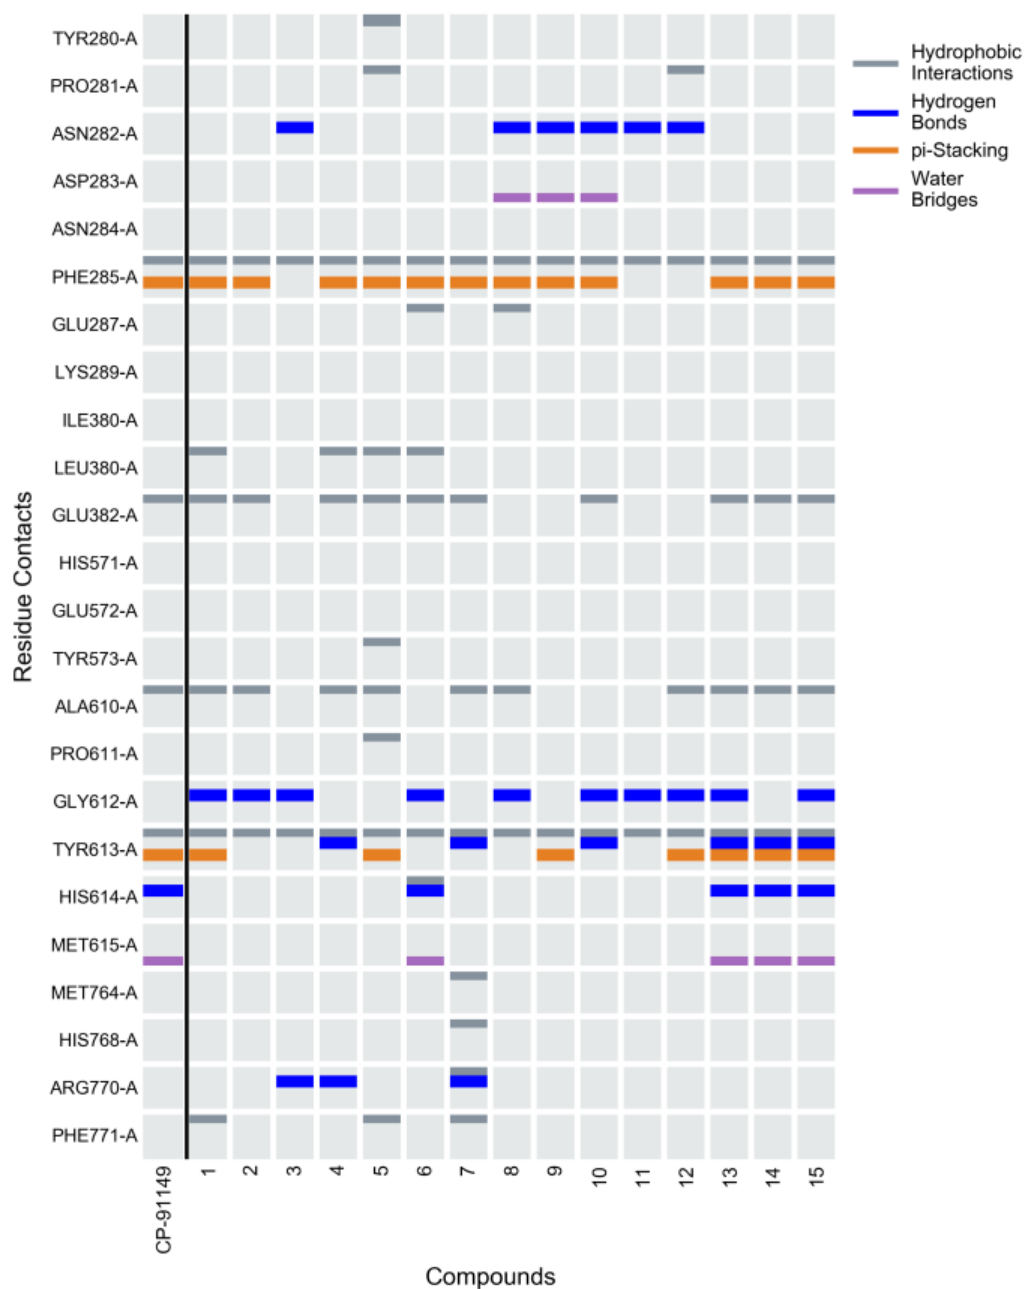

**Supporting Figure S2.** Interaction profile for Styrylpyrazoles. The X axis shows compounds sorted by activity and the black line separates actives from inactive.

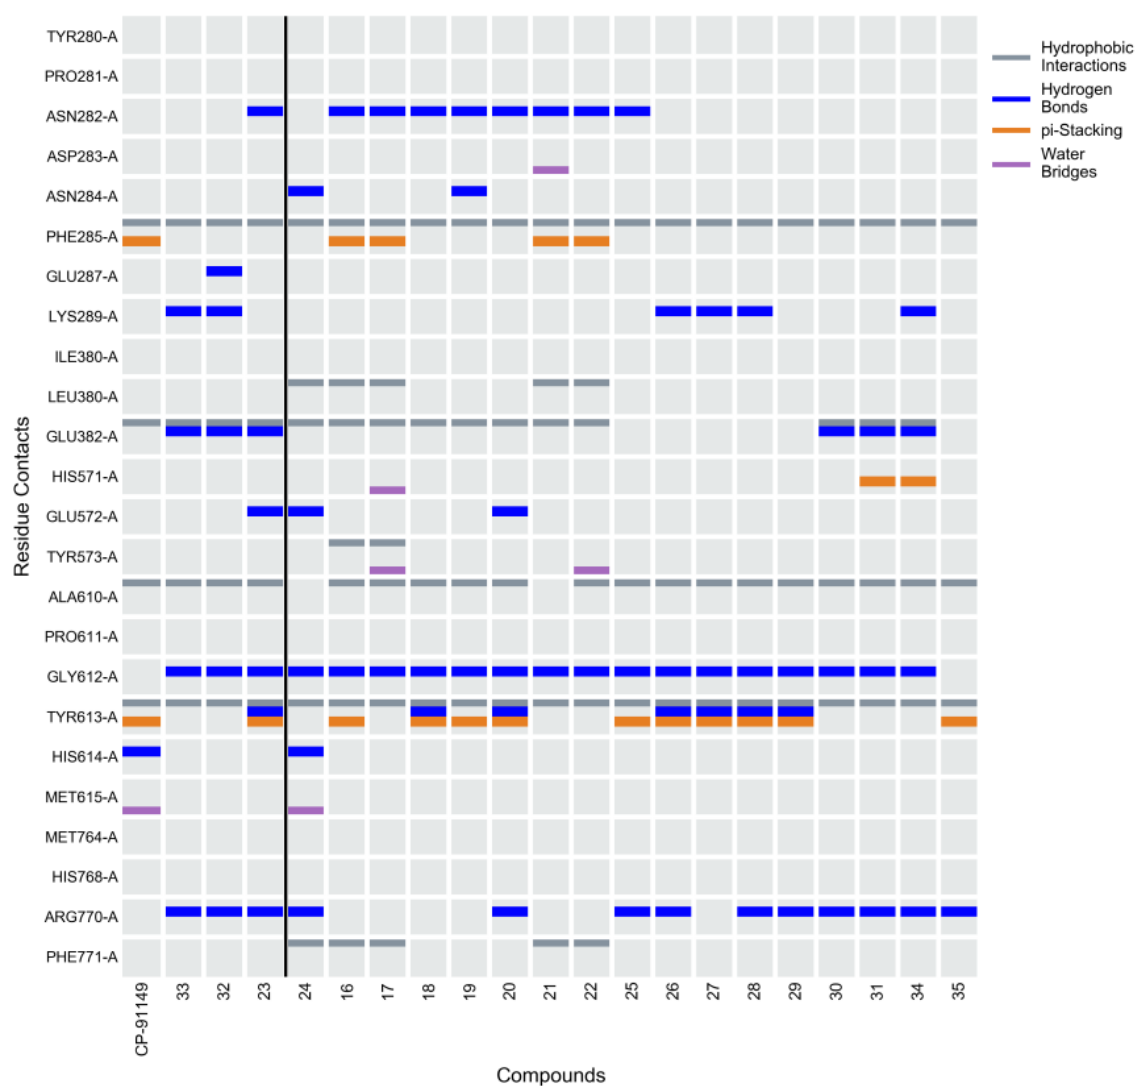

**Supporting Figure S3.** Interaction profile for 2-styrylchromones and 2-styrylchromone-related derivatives. The X axis shows compounds sorted by activity and the black line separates actives from inactives.

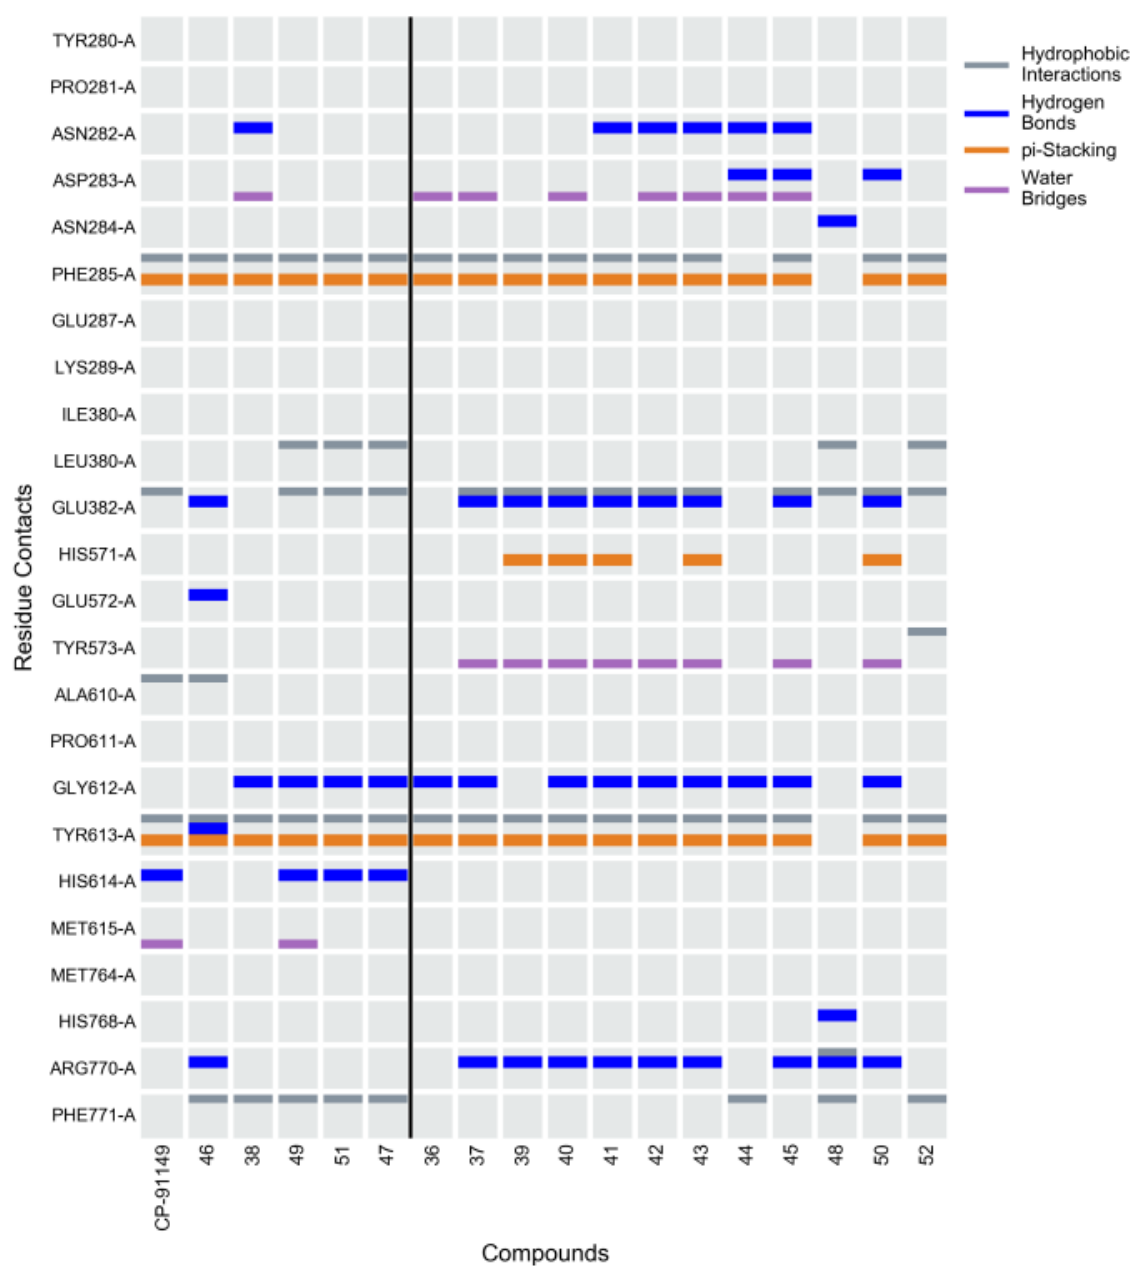

**Supporting Figure S4.** Interaction profile for Flavonoids. The X axis shows compounds sorted by activity and the black line separates actives from inactive.

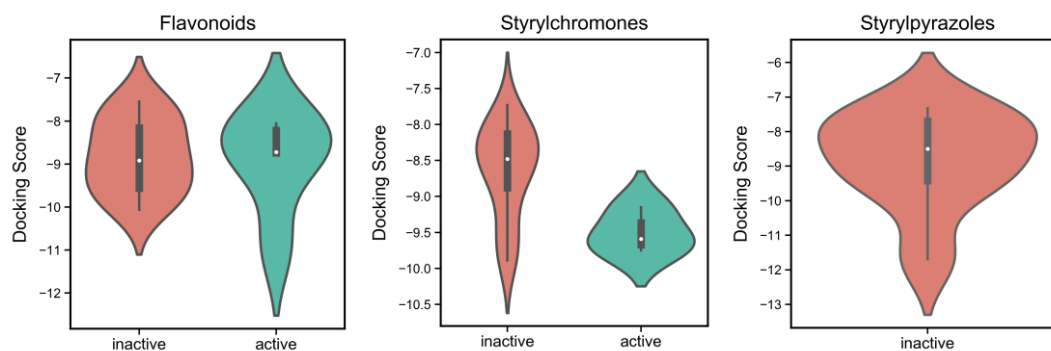

**Supporting Figure S5.** Distribution of docking scores for the library of compounds developed in this work, shown with respect to inactive and active compounds (when applicable).

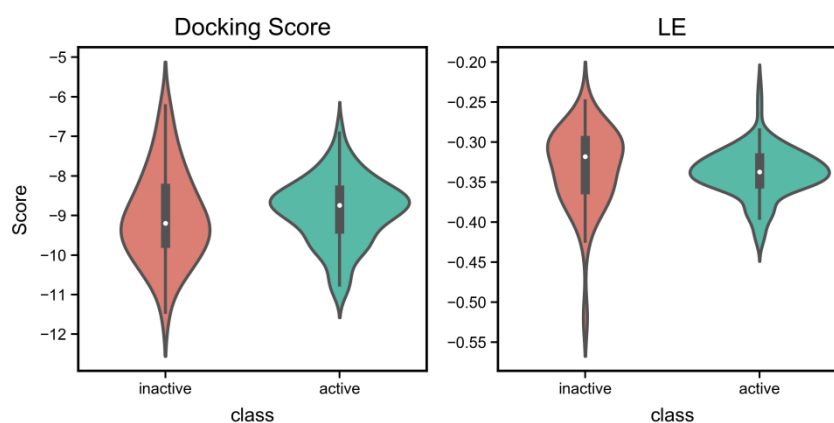

**Supporting Figure S6.** Distribution of docking scores and ligand efficiency (LE) values for ChEMBL actives and inactives.

**Supporting Table S2.** Activities, docking scores and ligand efficiency (LE) across all compounds developed in this work. Compounds are sorted inside their family, according to ascending docking score.

| Family     | Compound | Docking score | LE     | IC <sub>50</sub> (μM) |
|------------|----------|---------------|--------|-----------------------|
| Flavonoids | 49       | -10.88        | -0.286 | 20.5                  |
|            | 45       | -10.06        | -0.457 | >50.0                 |
|            | 50       | -9.87         | -0.429 | >50.0                 |
|            | 41       | -9.58         | -0.479 | >50.0                 |
|            | 43       | -9.55         | -0.455 | >50.0                 |
|            | 39       | -9.11         | -0.479 | >50.0                 |
|            | 40       | -9.0          | -0.45  | >50.0                 |
|            | 48       | -8.84         | -0.421 | >50.0                 |
|            | 47       | -8.74         | -0.437 | 23.5                  |
|            | 46       | -8.72         | -0.436 | 13.2                  |

|                                                               |          |        |        |       |
|---------------------------------------------------------------|----------|--------|--------|-------|
|                                                               | 44       | -8.41  | -0.42  | >50.0 |
|                                                               | 42       | -8.28  | -0.414 | >50.0 |
|                                                               | 51       | -8.22  | -0.391 | 22.6  |
|                                                               | 38       | -8.06  | -0.424 | 19.3  |
|                                                               | 37       | -7.82  | -0.412 | >50.0 |
|                                                               | 52       | -7.75  | -0.337 | >50.0 |
|                                                               | 36       | -7.55  | -0.419 | >50.0 |
| 2-Styrylchromones<br>and 2-styrylchromone-related derivatives | 31       | -9.89  | -0.412 | >50.0 |
|                                                               | 24       | -9.79  | -0.408 | >25.0 |
|                                                               | 33       | -9.75  | -0.375 | 15.9  |
|                                                               | 32       | -9.59  | -0.4   | 16.7  |
|                                                               | 30       | -9.57  | -0.416 | >50.0 |
|                                                               | 34       | -9.29  | -0.372 | 50.0  |
|                                                               | 23       | -9.15  | -0.398 | 31.7  |
|                                                               | 20       | -8.88  | -0.404 | >50.0 |
|                                                               | 25       | -8.68  | -0.347 | >50.0 |
|                                                               | 21       | -8.65  | -0.412 | >50.0 |
|                                                               | 19       | -8.52  | -0.387 | >50.0 |
|                                                               | 35       | -8.48  | -0.314 | >50.0 |
|                                                               | 29       | -8.47  | -0.339 | >50.0 |
|                                                               | 26       | -8.34  | -0.309 | >50.0 |
|                                                               | 18       | -8.18  | -0.39  | >50.0 |
|                                                               | 22       | -8.13  | -0.37  | >50.0 |
|                                                               | 28       | -8.11  | -0.324 | >50.0 |
|                                                               | 16       | -8.08  | -0.404 | >50.0 |
|                                                               | 27       | -8.05  | -0.298 | >50.0 |
|                                                               | 17       | -7.73  | -0.368 | >50.0 |
| Styrylpyrazoles                                               | 14       | -11.69 | -0.292 | >50.0 |
|                                                               | 15       | -11.62 | -0.277 | >50.0 |
|                                                               | 13       | -9.61  | -0.3   | >50.0 |
|                                                               | 7        | -9.45  | -0.286 | >50.0 |
|                                                               | 12       | -9.39  | -0.335 | >50.0 |
|                                                               | 6        | -9.24  | -0.289 | >50.0 |
|                                                               | 5        | -9.04  | -0.301 | >50.0 |
|                                                               | 11       | -8.5   | -0.405 | >50.0 |
|                                                               | 10       | -8.22  | -0.411 | >50.0 |
|                                                               | 2        | -7.98  | -0.38  | >50.0 |
|                                                               | 1        | -7.79  | -0.39  | >50.0 |
|                                                               | 3        | -7.62  | -0.346 | >50.0 |
|                                                               | 4        | -7.57  | -0.315 | >50.0 |
|                                                               | 8        | -7.53  | -0.327 | >50.0 |
|                                                               | 9        | -7.33  | -0.282 | >50.0 |
| Control                                                       | CP-91149 | -9.44  | -0.337 | 0.58  |

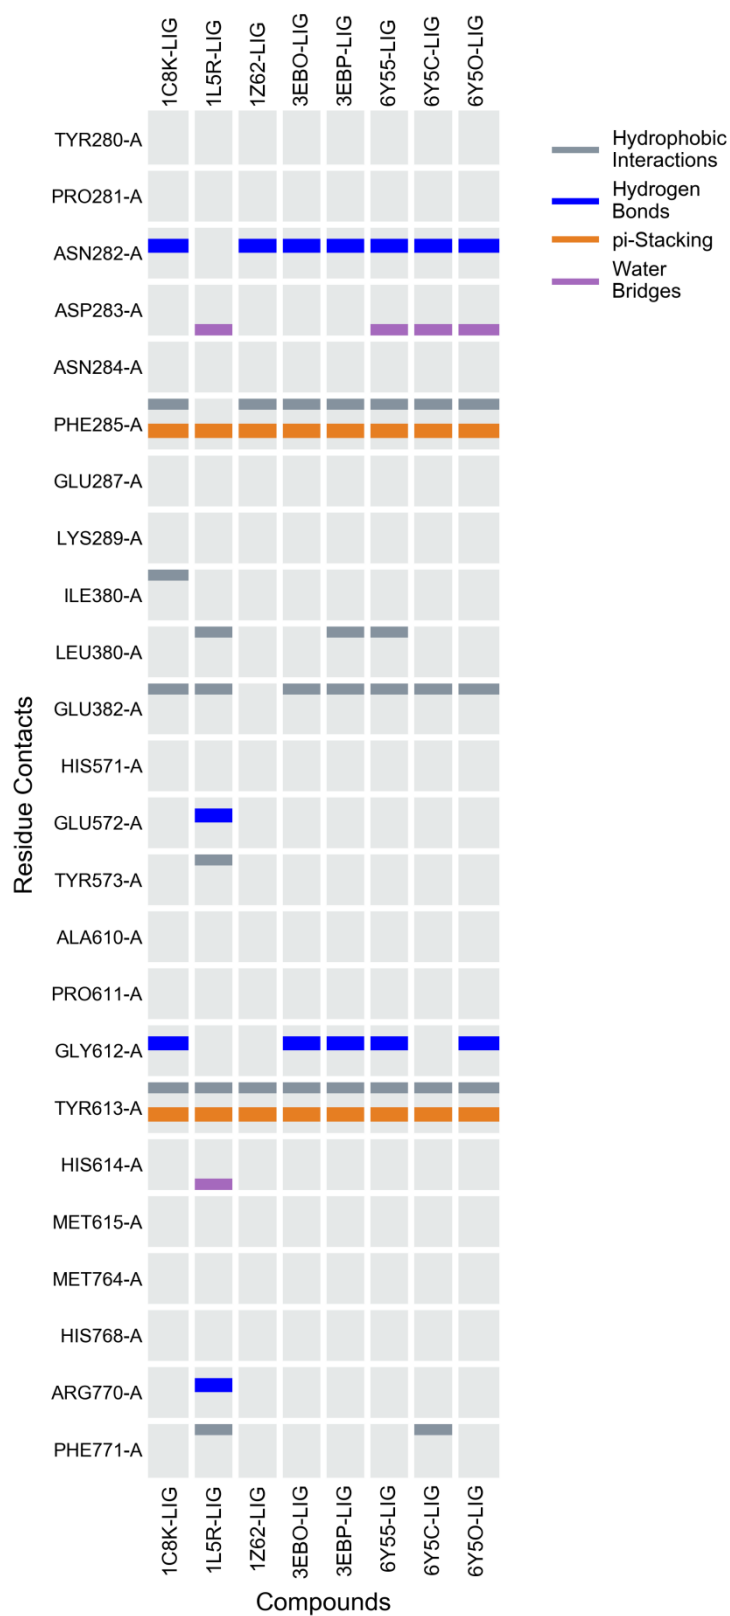

**Supporting Figure S7.** X-ray contacts observed in the PDBs considered in cross-docking.
